# Supplementary material for: Distinct high resolution genome profiles of early onset and late onset colorectal cancer integrated with gene expression data identify candidate susceptibility loci
Source: Mol Cancer. 2010 May 6;9:100. doi: 10.1186/1476-4598-9-100 (PMC2885343; doi:10.1186/1476-4598-9-100)
Supplement: Additional file 1 — Summary of clinical data for all patients included in the study. [file 1476-4598-9-100-S1.XLS]

## Sheet: Supplementary table 1
	Patient ID	Sex	AaD	Dukes' stage	Localization in colon/rectum	TP53 mutation status
Early onset
	0003	Female	48	B	Rectum	wt
	0004	Female	44	D	Proximal (Transverse colon)	mut
	0005	Female	53	B	Rectum	mut
	0007	Female	41	C	Rectum	mut
	0010	Female	34	D	Proximal (Coekum)	wt
	0015	Male	52	A	Proximal (Ascending colon)	wt
	0016	Male	46	C	Distal (Sigmoid colon)	mut
	0021	Female	46	A	Rectum	wt
	0022	Female	34	D	Proximal (Coekum)	mut
	0023	Female	42	C	Rectum	mut
	0024	Female	49	D	Rectum	mut
	0028	Male	49	B	Distal (Sigmoid colon)	mut
	0032	Male	47	C	Distal (Descending colon)	mut
	0034	Male	43	C	Proximal (Coekum)	wt
	0038	Female	45	C	Rectum	wt
	0039	Female	28	A	Distal (Sigmoid colon)	mut
	0040	Male	46	C	Distal (Sigmoid colon)	wt
	0041	Male	40	C	Rectum	mut
	0043	Male	43	C	Distal (Sigmoid colon)	mut
	0048	Female	30	A	Rectum	wt
	0051	Female	47	B	Distal (Descending colon)	mut
	0065	Male	44	B	Rectum	mut
	0066	Male	42	C	Proximal (Ascending colon)	wt
Late onset
	001	Female	71	A	Distal (Sigmoid colon)	mut
	002	Male	75	A	Rectum	wt
	007	Female	87	A	Rectum	mut
	017	Female	73	B	Rectum	mut
	018	Male	78	C	Distal (Sigmoid colon)	mut
	021	Male	77	A	Distal (Sigmoid colon)	mut
	028	Female	81	B	Distal (Sigmoid colon)	wt
	035	Female	81	A	Distal (Sigmoid colon)	mut
	038	Female	81	B	Distal (Sigmoid colon)	mut
	040	Male	69	D	Distal (Sigmoid colon)	mut
	044	Male	79	C	Proximal (Right flexure)	mut
	051	Male	79	B	Distal (Sigmoid colon)	wt
	053	Male	83	C	Distal (Sigmoid colon)	wt
	054	Male	83	C	Proximal (Ascending colon)	mut
	056	Male	83	C	Rectum	wt
	059	Female	83	B	Rectum	mut
	061	Female	74	D	Proximal (Coekum)	mut
