# Supplementary material for: Distinct high resolution genome profiles of early onset and late onset colorectal cancer integrated with gene expression data identify candidate susceptibility loci
Source: Mol Cancer. 2010 May 6;9:100. doi: 10.1186/1476-4598-9-100 (PMC2885343; doi:10.1186/1476-4598-9-100)
Supplement: Additional file 2 — Primer details for TP53 mutation analysis. Details of the fragments amplified for TP53 analysis. Both 5'- and 3' primers have M13 tails, indicated in capital letters. [file 1476-4598-9-100-S2.XLS]

## Sheet: Supplementary table 2
Fragment	Exons	PCR product size	5’ Primer sequence	3’ Primer sequence
1	2, 3, 4	837	TGTAAAACGACGGCCAGTtcagacactggcatggtgtt	CAGGAAACAGCTATGACCgccaaagggtgaagaggaat
2	5, 6	464	TGTAAAACGACGGCCAGTcacttgtgccctgactttca	CAGGAAACAGCTATGACCcttaacccctcctcccagag
3	7, 8, 9	887	TGTAAAACGACGGCCAGTcctgcttgccacaggtct	CAGGAAACAGCTATGACCaagaaaacggcattttgagtg
4	10	300	TGTAAAACGACGGCCAGTtgcatgttgcttttgtaccg	CAGGAAACAGCTATGACCgaaggcaggatgagaatgga
5	11	257	TGTAAAACGACGGCCAGTaaagcattggtcagggaaaa	CAGGAAACAGCTATGACCgcaagcaagggttcaaagac
